# Supplementary material
Source: PubMed Central journal article supplement (PMC5543893)
Supplement: MOL2-1-181-s001.pdf [file MOL2-1-181-s001.pdf]

**Phosphoprotein Keratin 23 accumulates in MSS but not MSI colon cancers *in vivo* and impacts viability and proliferation *in vitro***

**Supplementary Figure 1**

**Immunohistochemical analyses** were performed applying the rabbit anti-K23 antibody in a 1:600 dilution to a tissue microarray with various human tumors from different organ sites and matching or non-matching normal tissues (100 x magnification).

a)-f) K23 is upregulated in adenocarcinomas compared to normal mucosa from the same organ. a) normal pancreas (exocrine only); b) pancreas adenocarcinoma; c)-f) gastrointestinal adenocarcinomas of the c) stomach d) small intestine e) colon and f) rectum

g)-l) K23 is not differentially expressed in epithelial cells of the prostate, bladder or uterus.

g) normal prostate ; h) prostate adenocarcinoma; i) normal urothelium j) bladder transitional cell carcinoma grade II; k) normal endometrium; l) adenocarcinoma of the endometrium.

g)-l) K23 is not differentially expressed in epithelial cells of the prostate, bladder or uterus. g) normal prostate ; h) prostate adenocarcinoma; i) normal urothelium j) bladder transitional cell carcinoma grade II; k) normal endometrium; l) adenocarcinoma of the endometrium.

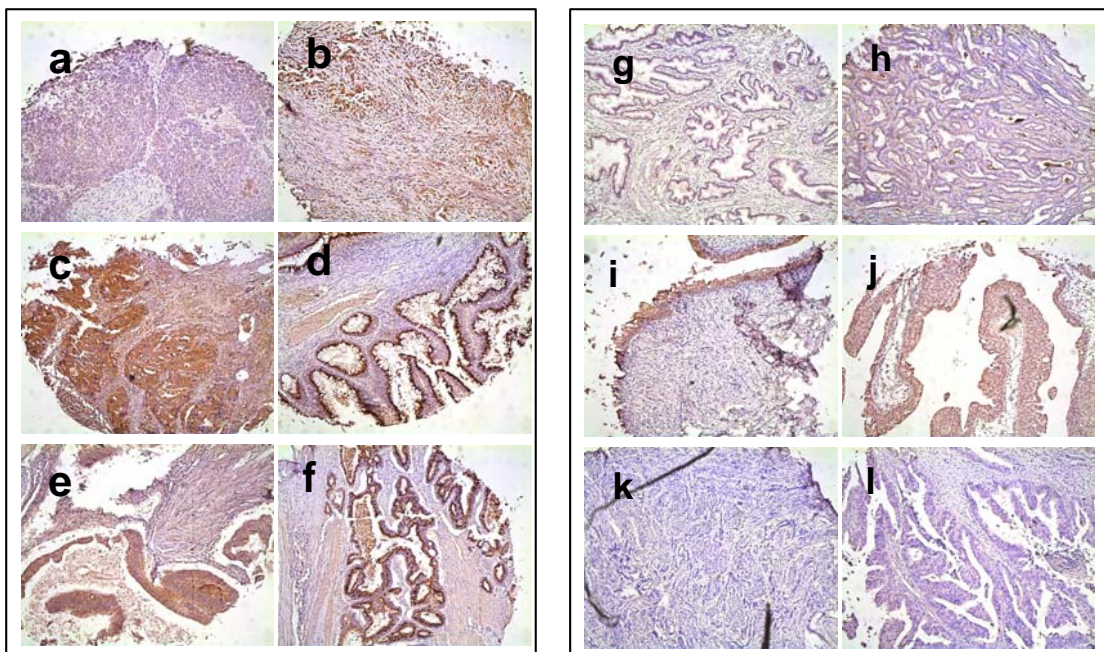

**Supplementary Figure 2**

**Confocal microscopy of COS7 cells overexpressing *KRT23*.** Cells were labeled with the polyclonal rabbit anti-K23 antibody, applied in a 1:600 dilution. K23 expression (green) was visualized applying a 1:2000 dilution of the secondary antibody AlexaFlour 488 goat anti-rabbit IgG highly cross-adsorbed. (Leica DMRS confocal microscope, 63x, 2x zoom; Z-stack, 0.5m interval)

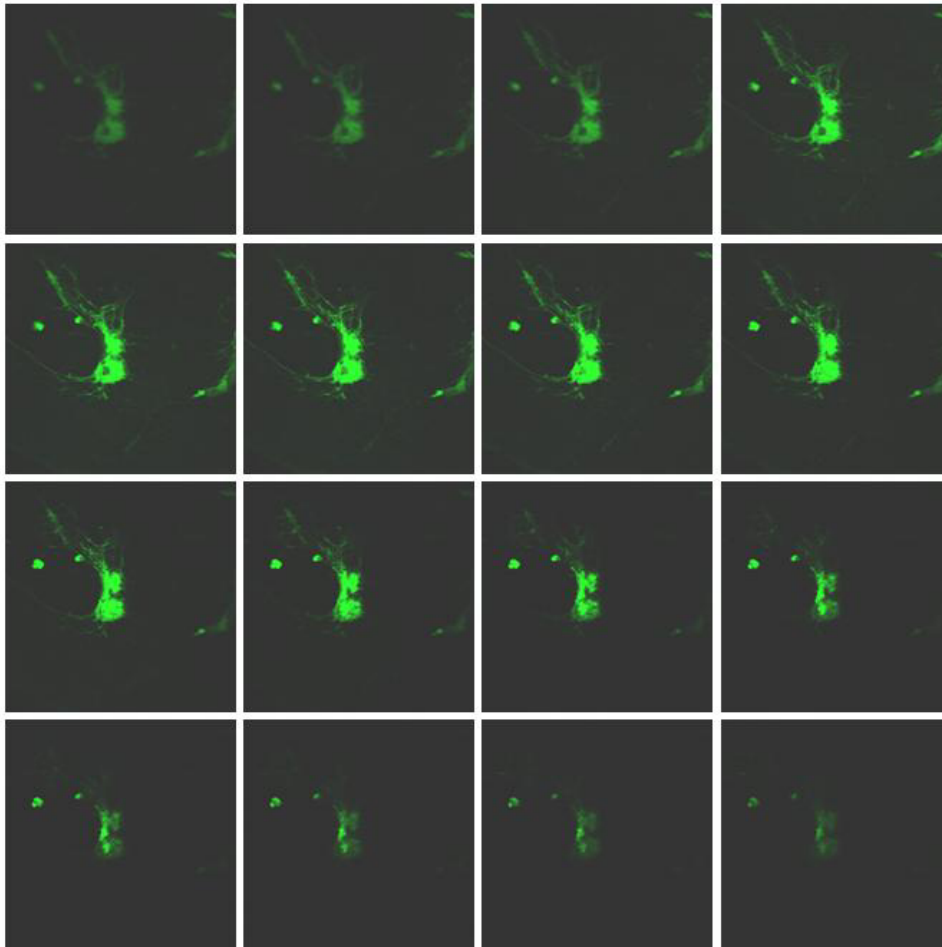

**Supplementary Figure 3**

**Supervised Cluster analyses.** Heatmap of the top 371 transcripts separating tumor with status “MSS-high Keratin23” and “MSI-low/no Keratin 23” as identified by immunohistochemistry followed by supervised clustering of transcript profiling data. Genes with a p-value < 0.05 in a SAM analysis and with a variance across all samples >0.5 were clustered using Cluster and Treeview (Eisen). Red are upregulated and green are downregulated genes.

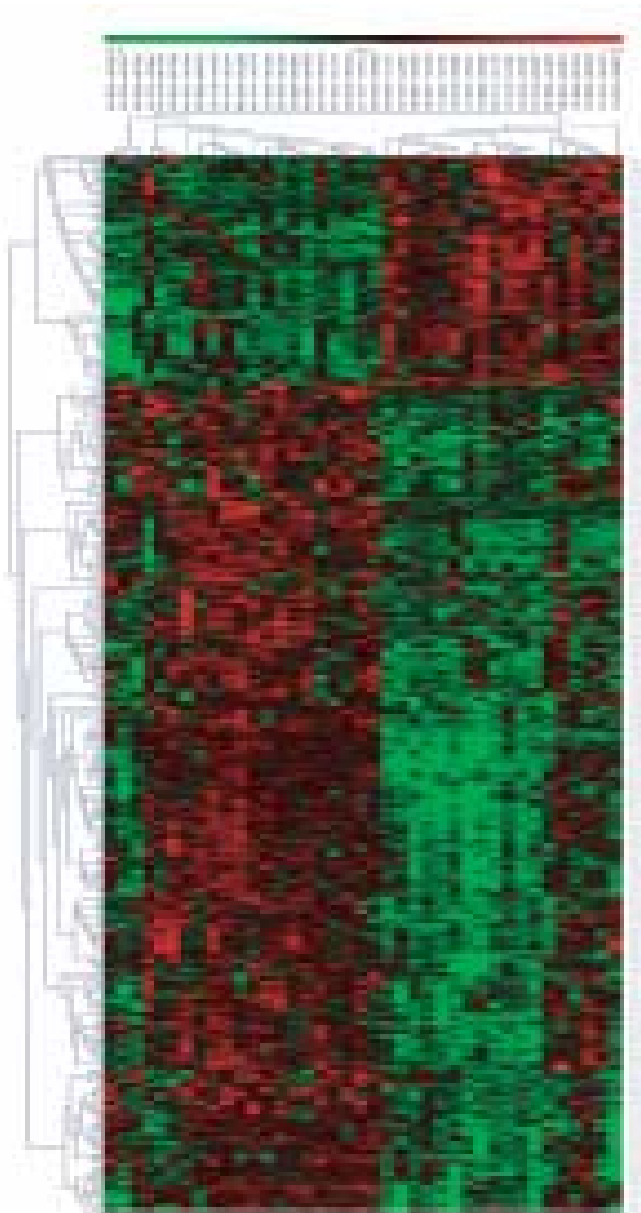

**Supplementary Figure 4**

**Ingenuity pathway analyses (IPA5.0).** Transcript profiling data (U133plus2.0) from 10 normal colon mucosae were compared to those from 118 MSS and 35 MSI colon adenocarcinomas as well as to colon cancer cell lines SW480, CaCo2 (MSS) and HCT15, HCT116 (MSI). *KRT23*, *CEL*, *DACH1*, *CEBPB*, *TGIF2*, *SERPINE/2* and *NOTCH1* were upregulated in MSS tumors, while *TFAP2a* and *NFIC* were upregulated in MSI tumors. Expression patterns of *KRT23* and *CEBPB* (MSS) and *TFAP2a* and *NFIC* (MSI) are reproducible in the cell lines analyzed.

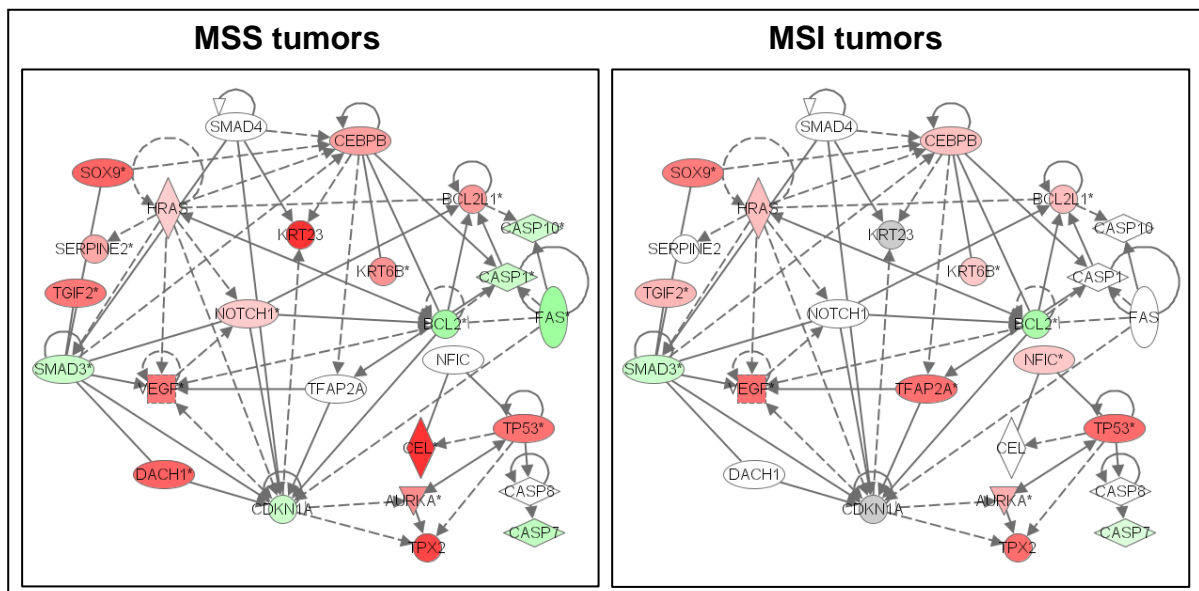

**Supplementary Table 1**

**Transcript profiling of seven keratins.** Expression profiling of 122 colon samples using HG-U133A2.0 arrays and of 163 colon samples using HG-U133plus2.0 arrays shows strong significant upregulation of *KRT23* in MSS tumors compared to low transcript levels in MSI tumors and normal colon mucosa. Genome wide profiling identified only six other keratins to be differentially expressed in colon adenocarcinomas compared to normal mucosas. Extremely high expression of a keratin restricted to MSS tumors is thus a unique feature for *KRT23*. Median transcript signal, SD and fold change (FC) are given as log2 values.

| Probe set                   | Symbol       | Normal |      | MSS    |      | MSI    |      | N vs MSS |         | N vs MSI |         | MSS vs MSI |         |
|-----------------------------|--------------|--------|------|--------|------|--------|------|----------|---------|----------|---------|------------|---------|
|                             |              | median | sd   | median | sd   | median | sd   | FC       | p       | FC       | p       | FC         | p       |
| <b>HG-U133A2.0 array</b>    |              | n=17   |      | n=67   |      | n=38   |      |          |         |          |         |            |         |
| 218963_s_at                 | <b>KRT23</b> | 5.6    | 0.2  | 7.6    | 1.4  | 5.5    | 0.7  | 1.4      | 4.8E-18 | 1.0      | 6.4E-01 | 0.7        | 4.1E-16 |
| <b>HG-U133Plus2.0 array</b> |              | n=10   |      | n=118  |      | n=35   |      |          |         |          |         |            |         |
| 218963_s_at                 | <b>KRT23</b> | 2.3    | 0.16 | 8.0    | 3.12 | 2.8    | 2.37 | 3.4      | 9.9E-35 | 1.2      | 3.3E-04 | 0.3        | 1.2E-09 |
| 213680_at                   | <b>KRT6B</b> | 2.1    | 0.06 | 3.9    | 2.63 | 3.3    | 2.48 | 1.9      | 1.2E-18 | 1.6      | 1.5E-05 | 0.8        | 3.8E-01 |
| 209016_s_at                 | <b>KRT7</b>  | 2.9    | 0.14 | 3.2    | 0.87 | 3.8    | 1.45 | 1.1      | 2.8E-07 | 1.3      | 1.6E-06 | 1.2        | 9.4E-04 |
| 207811_at                   | <b>KRT12</b> | 3.8    | 1.31 | 2.5    | 0.62 | 2.5    | 0.48 | 0.7      | 6.4E-03 | 0.6      | 5.4E-03 | 1.0        | 6.9E-01 |
| 212236_x_at                 | <b>KRT17</b> | 4.6    | 0.26 | 5.6    | 1.47 | 5.4    | 1.51 | 1.2      | 1.1E-10 | 1.2      | 4.6E-05 | 1.0        | 8.8E-01 |
| 213953_at                   | <b>KRT20</b> | 13.9   | 0.45 | 11.7   | 1.99 | 11.2   | 2.76 | 0.8      | 9.7E-16 | 0.8      | 2.5E-08 | 1.0        | 1.4E-01 |
| 220267_at                   | <b>KRT24</b> | 4.9    | 0.88 | 2.6    | 0.34 | 2.6    | 0.46 | 0.5      | 3.3E-05 | 0.5      | 2.4E-05 | 1.0        | 8.1E-01 |

**Supplementary Table 2**

**Top 17 genes (top 18 probe sets) differentially expressed between MSS tumors with high**

**Keratin23 and MSI tumors with low Keratin 23** as identified by immunohistochemistry followed

by supervised clustering of transcript profiling data. Ratios are given as normalized ratio log2 (-INF, -

1] and [1, +INF).

| Probe Set ID | Gene           | Gene Title                                          | normalized ratio                 |       | median log2 |      |      | MSS vs<br>MSI |
|--------------|----------------|-----------------------------------------------------|----------------------------------|-------|-------------|------|------|---------------|
|              |                |                                                     | log2 (-INF, -1] and<br>[1, +INF) |       | N           | MSS  | MSI  |               |
|              |                |                                                     | MSS-N                            | MSI-N | n=17        | n=21 | n=18 | p value       |
| 218963_s_at  | <b>KRT23</b>   | keratin 23 (histone deacetylase inducible)          | 2.1                              | -0.1  | 5.6         | 7.7  | 5.6  | 1.6E-07       |
| 221031_s_at  | <b>APOLD1</b>  | apolipoprotein L domain containing 1                | 1.8                              | -0.2  | 6.6         | 8.3  | 6.4  | 2.6E-05       |
| 218704_at    | <b>RNF43</b>   | ring finger protein 43                              | 2.4                              | 0.5   | 7.2         | 9.7  | 7.7  | 1.9E-08       |
| 218353_s_at  | <b>RGS5</b>    | regulator of G-protein signalling 5                 | 0.2                              | -1.5  | 6.9         | 7.1  | 5.3  | 4.9E-07       |
| 218002_s_at  | <b>CXCL14</b>  | chemokine (C-X-C motif) ligand 14                   | 1.1                              | -2.2  | 8.7         | 9.8  | 6.5  | 7.1E-08       |
| 217875_s_at  | <b>TMEPAI</b>  | transmembrane, prostate androgen induced RNA        | 1.6                              | 0.0   | 6.7         | 8.3  | 6.6  | 6.9E-06       |
| 209049_s_at  | <b>PRKCBP1</b> | protein kinase C binding protein 1                  | 0.9                              | -0.6  | 7.2         | 8.1  | 6.6  | 5.1E-08       |
| 208121_s_at  | <b>PTPRO</b>   | protein tyrosine phosphatase, receptor type, O      | 2.4                              | 0.2   | 6.0         | 8.3  | 6.2  | 6.3E-07       |
| 207457_s_at  | <b>LY6G6D</b>  | lymphocyte antigen 6 complex, locus G6D             | 1.6                              | -0.1  | 6.4         | 8.0  | 6.3  | 2.8E-06       |
| 206286_s_at  | <b>TDGF1</b>   | teratocarcinoma-derived growth factor 1             | 2.0                              | 0.2   | 6.2         | 8.2  | 6.5  | 6.0E-09       |
| 206108_s_at  | <b>SFRS6</b>   | splicing factor, arginine/serine-rich 6             | 0.0                              | 2.4   | 6.3         | 6.3  | 8.8  | 9.9E-12       |
| 205910_s_at  | <b>CEL</b>     | carboxyl ester lipase (bile salt-stimulated lipase) | 1.8                              | -0.1  | 5.3         | 7.1  | 5.3  | 1.7E-05       |
| 205471_s_at  | <b>DACH1</b>   | dachshund homolog 1 (Drosophila)                    | 1.4                              | 0.0   | 5.5         | 7.0  | 5.5  | 1.2E-06       |
| 205242_at    | <b>CXCL13</b>  | chemokine (C-X-C motif) ligand 13                   | -1.8                             | -0.3  | 6.9         | 5.1  | 6.7  | 8.8E-06       |
| 204070_at    | <b>RARRES3</b> | retinoic acid receptor responder 3                  | -1.1                             | 1.0   | 8.5         | 7.4  | 9.5  | 4.7E-09       |
| 203896_s_at  | <b>PLCB4</b>   | phospholipase C, beta 4                             | 1.6                              | 0.1   | 5.1         | 6.7  | 5.2  | 3.9E-08       |
| 201369_s_at  | <b>ZFP36L2</b> | zinc finger protein 36, C3H type-like 2             | 0.4                              | -1.5  | 8.1         | 8.5  | 6.6  | 1.3E-05       |
| 201367_s_at  | <b>ZFP36L2</b> | zinc finger protein 36, C3H type-like 2             | 1.2                              | -0.7  | 5.9         | 7.1  | 5.2  | 2.0E-05       |

**Supplementary Table 3**

**Transcript profiling of 16 TFs potentially targeting *KRT23* monitored on 163 tissue samples**

(U133plus arrays). Signal values are given as median log 2. Seven TFs with significant differences between MSS and MSI tumors with regard to the p value and the expression level are indicated with an asterisk. Three TFs, CEBPA, CEBPB and FOXQ1, shown in bold letters were regarded as highly relevant.

| ID               | Gene         | Chr                                                                               | median log2 signal |                |               | p value      |                 |                 |                 |
|------------------|--------------|-----------------------------------------------------------------------------------|--------------------|----------------|---------------|--------------|-----------------|-----------------|-----------------|
|                  |              |                                                                                   | N<br>(n=10)        | MSS<br>(n=118) | MSI<br>(n=35) | N vs<br>MSS  | N vs<br>MSI     | MSS vs<br>MSI   |                 |
| <b>204039_at</b> | <b>CEBPA</b> | <b>* CCAAT/enhancer binding protein (C/EBP), alpha</b>                            | <b>19q13.1</b>     | <b>8.03</b>    | <b>8.46</b>   | <b>7.61</b>  | <b>8.00E-02</b> | <b>1.90E-01</b> | <b>2.64E-05</b> |
| <b>212501_at</b> | <b>CEBPB</b> | <b>* CCAAT/enhancer binding protein (C/EBP), beta</b>                             | <b>20q13.1</b>     | <b>9.26</b>    | <b>11.11</b>  | <b>10.66</b> | <b>5.18E-06</b> | <b>6.86E-05</b> | <b>4.87E-05</b> |
| <b>227475_at</b> | <b>FOXQ1</b> | <b>* forkhead box Q1</b>                                                          | <b>6p25</b>        | <b>2.66</b>    | <b>10.17</b>  | <b>7.98</b>  | <b>3.33E-33</b> | <b>2.20E-14</b> | <b>6.55E-06</b> |
| 202221_s_ε       | EP300        | * E1A binding protein p300                                                        | 22q13.2            | 7.76           | 7.39          | 7.66         | 5.28E-01        | 6.10E-01        | 3.21E-02        |
| 210446_at        | GATA1        | * GATA binding protein 1                                                          | Xp11.23            | 2.16           | 2.15          | 2.15         | 5.77E-01        | 1.56E-02        | 4.17E-02        |
| 209636_at        | NFKB2        | * nuclear factor of kappa light polypeptide gene enhancer in B-cells 2 (p49/p100) | 10q24              | 3.32           | 4.07          | 4.10         | 1.13E-04        | 6.71E-07        | 1.08E-02        |
| 40569_at         | ZNF42/MZF1   | * Zinc finger protein 42 (myeloid-specific retinoic acid-responsive)              | 19q13.2-q13.4      | 6.89           | 7.07          | 7.68         | 8.85E-02        | 3.54E-03        | 5.50E-03        |
| 241612_at        | FOXD3        | forkhead box D3                                                                   | 1p32-p31           | 2.86           | 2.76          | 2.75         | 1.20E-01        | 8.21E-02        | 9.95E-02        |
| 209710_at        | GATA2        | GATA binding protein 2                                                            | 3q21.3             | 5.29           | 4.86          | 4.88         | 1.58E-02        | 3.18E-02        | 7.34E-01        |
| 205038_at        | IKZF1        | IKAROS family zinc finger 1                                                       | 7p13-p11.1         | 2.77           | 2.49          | 2.49         | 5.72E-02        | 3.13E-01        | 1.05E-01        |
| 209239_at        | NFKB1        | nuclear factor of kappa light polypeptide gene enhancer in B-cells 1 (p105)       | 4q24               | 8.21           | 7.48          | 7.71         | 2.24E-07        | 6.53E-04        | 7.89E-02        |
| 206035_at        | REL          | v-rel reticuloendotheliosis viral oncogene homolog (avian)                        | 2p13-p12           | 2.34           | 2.33          | 2.32         | 2.31E-01        | 1.07E-01        | 5.06E-01        |
| 1569638_at       | SOX5         | SRY (sex determining region Y)-box 5                                              | 12p12.1            | 2.35           | 2.34          | 2.34         | 3.96E-01        | 2.06E-01        | 3.52E-01        |
| 207893_at        | SRY          | sex determining region Y                                                          | Yp11.3             | 2.09           | 2.08          | 2.08         | 5.62E-02        | 3.49E-02        | 4.93E-01        |
| 205688_at        | TFAP4        | transcription factor AP-4 (activating enhancer binding protein 4)                 | 16p13              | 4.26           | 4.50          | 4.37         | 6.44E-04        | 1.82E-02        | 6.21E-02        |
| 209338_at        | TFCP2        | transcription factor CP2                                                          | 12q13              | 6.37           | 7.19          | 7.11         | 4.82E-05        | 6.16E-05        | 3.86E-01        |
